# Supplementary material
Source: publisher site journal article supplement (https://www.dovepress.com/article/292373)
Supplement: Supplementary file 1 [file get_supplementary_file.php]

**Appendix Questionnaire**

1. Are you the medical director of the sleep center you are working in? (check only one)

- Yes
- No

1. The location of your sleep center is in (fill in the blanks)

province city

1. Which department is your sleep center clinically affiliated to? (check only one)
   - Pulmonary and critical care department
   - Neurology department
   - Otorhinolaryngology department
   - Sleep Medicine department
2. How many sleep beds are there in your sleep center? (check only one)

- 0-3
- 4-6
- ≥7

1. How about the patient spectrum of your sleep center? (check only one)

- focus on sleep disordered breathing
- entire spectrum of sleep/wake disorders

1. Compared with the same period of the previous year, how about the changes of the patient volume of sleep tests, including polysomnography (PSG) and home polygraphy, in your sleep center during the COVID-19 pandemic? (fill in the blanks, 0-100%)

- February to March 2020: %;
- April to May 2020: %;
- June 2020: %.

1. As for the diagnosis method of SDB during the pandemic and beforehand in your sleep center, how about the proportion of PSG, home polygraphy and empiric therapy without sleep test? (fill in the blanks, 0-100%，the total proportion of PSG, home polygraphy and empiric therapy without sleep test is 100% )

- Beforehand routine

PSG %； polygraphy %； empiric therapy without sleep test %

- February to March 2020

PSG %； polygraphy %；empiric therapy without sleep test %

- April to May 2020

PSG %； polygraphy %；empiric therapy without sleep test %

- June 2020

PSG %； polygraphy %；empiric therapy without sleep test %

1. Compared with the same period of the previous year, how about the changes of the patient volume of positive airway pressure (PAP) titration, including laboratory manual titration, laboratory auto titration and home auto titration in your sleep center during the pandemic? (fill in the blanks, 0-100%)

- February to March 2020: %;
- April to May 2020: %;
- June 2020: %.

1. As for the PAP initiation method for patients with SDB during the pandemic and beforehand in your sleep center, how about the proportion of lab manual titration, lab auto titration and home auto initiation? (fill in the blanks, 0-100%，the total proportion of lab manual titration, lab auto titration and home auto initiation is 100%)

- Beforehand routine

lab manual %；lab auto %；home auto %

- February to March 2020

lab manual %；lab auto %；home auto %

- April to May 2020

lab manual %；lab auto %；home auto %

- June 2020

lab manual %；lab auto %；home auto %

1. As for the follow-up method for PAP treatment during the pandemic and beforehand in your sleep center, how about the proportion of clinic visit, telephone, telemedicine and without follow-up? (fill in the blanks, 0-100%，the total proportion of clinic visit, telephone, telemedicine and without follow-up is 100%).

- Beforehand routine：

clinic visit %；telephone %；telemedicine %, without follow-up %

- February to March 2020：

clinic visit %；telephone %；telemedicine %, without follow-up %

- April to May 2020：

clinic visit %；telephone %；telemedicine %, without follow-up %

- June 2020:

clinic visit %；telephone %；telemedicine %, without follow-up %

11. Had telemedicine been practiced for SDB diagnosis during the pandemic and beforehand in your sleep center? If the answer is yes, which mode was used for SDB diagnosis, center to center (C2C) or center to patient (C2P)?

- Beforehand:
- No
- Yes,

If the answer is yes, which mode was used (check all that apply)

- C2C
- C2P
- February to March 2020:
- No
- Yes,

If the answer is yes, which mode was used (check all that apply)

- C2C
- C2P
- April to May 2020:
- No
- Yes,

If the answer is yes, which mode was used (check all that apply)

- C2C
- C2P
- June 2020:
- No
- Yes,

If the answer is yes, which mode was used (check all that apply)

- C2C
- C2P

12. Had telemedicine been practiced for PAP titration during the pandemic and beforehand in your sleep center? If the answer is yes, which mode was used for PAP titration, center to center (C2C) or center to patient (C2P)?

- Beforehand:
- No
- Yes,

If the answer is yes, which mode was used (check all that apply)

- C2C
- C2P
- February to March 2020:
- No
- Yes,

If the answer is yes, which mode was used (check all that apply)

- C2C
- C2P
- April to May 2020:
- No
- Yes,

If the answer is yes, which mode was used (check all that apply)

- C2C
- C2P
- June 2020:
- No
- Yes,

If the answer is yes, which mode was used (check all that apply)

- C2C
- C2P

13. Had telemedicine been practiced for follow-up during the pandemic and beforehand in your sleep center? If the answer is yes, how about the proportion of patients using telemedicine follow-ups in your center? (fill in the blanks, 0-100%)

- Beforehand
- No
- Yes,

If the answer is yes, the proportion of patients using telemedicine follow-up is %

- February to March 2020
- No
- Yes

If the answer is yes, the proportion of patients using telemedicine follow-up is %

- April to May 2020
- No
- Yes,

If the answer is yes, the proportion of patients using telemedicine follow-up is %

- June 2020:
- No
- Yes,

If the answer is yes, the proportion of patients using telemedicine follow-up is %

14. What is your estimation of the impact of the COVID-19 epidemic on telemedicine for SDB management in the future? (check only one)

- increase
- No change
- decrease
- uncertain

1. How would you evaluate your knowledge on telemedicine for SDB management? (check only one)

- very good
- quite good
- not too much
- have no idea at all

16 What do you think the obstacles for the implication of telemedicine for SDB management？(check all that apply)

- technology and equipment
- health care policies and regulations
- medical insurance payment system
- lack of personnel

1. How about the changes of medical staff still active in sleep service during the pandemic compared with beforehand? (fill in the blanks, 0–100%)

- February to March 2020

physicians %, technicians/nurses %, visiting personnel in training program %

- April to May 2020

physicians %, technicians/nurses %, visiting personnel in training program %

- June 2020

physicians %, technicians/nurses %, visiting personnel in training program %

1. Had there been any medical staff working in your sleep center infected with COVID-19 during the pandemic?

- No
- Yes,

If the answer is yes, how many medical staff had been infected from February to June? （fill in the blanks）

- February to March 2020
- April to May 2020
- June 2020
